# Supplementary material
Source: PubMed Central journal article supplement (PMC3613913)
Supplement: JCI65292sd.pdf [file JCI65292sd.pdf]

## Supplementary Appendix

This appendix has been provide by the authors to give readers additional information about their work

**Supplemental Table 1**

| <b>MPO-ANCA Cohort (CH): Description of 87 sera samples</b> |               |                                              |                 |
|-------------------------------------------------------------|---------------|----------------------------------------------|-----------------|
|                                                             | <b>Number</b> | <b>Mean age <math>\pm</math> std (years)</b> | <b>% Female</b> |
| <b>Clinical Remission</b>                                   | 35            | 61.6 $\pm$ 16.8                              | 42.9% (15/35)   |
| <b>Active Disease:</b>                                      | 52            | 53.7 $\pm$ 18.8                              | 50% (26/52)     |
| <b>Onset of disease</b>                                     | 22            | 55.8 $\pm$ 18.5                              | 50% (11/22)     |
| <b>Relapse</b>                                              | 14            | 61.9 $\pm$ 15.6                              | 35.7% (5/14)    |
| <b>Smoldering Active</b>                                    | 8             | 53.1 $\pm$ 13.1                              | 87.5% (7/8)     |
| <b>Remission on Therapy</b>                                 | 5             | 70.4 $\pm$ 9.3                               | 20% (1/5)       |
| <b>Unresponsive to treatment</b>                            | 3             | 54.0 $\pm$ 21.0                              | 66.7% (2/3)     |

**Supplemental Table 2**

| <b>MPO-ANCA Cohort (NL): Description of 40 sera samples</b> |               |                                              |                 |
|-------------------------------------------------------------|---------------|----------------------------------------------|-----------------|
|                                                             | <b>Number</b> | <b>Mean age <math>\pm</math> std (years)</b> | <b>% Female</b> |
| <b>Clinical Remission</b>                                   | 20            | 66.2 [41.7-78.4]                             | 50% (10/20)     |
| <b>Active Disease:</b>                                      | 20            | 65.5 [41.5-77.9]                             | 50% (10/20)     |
| <b>Onset of disease</b>                                     | 20            | 65.5 [41.5-77.9]                             | 50% (10/20)     |
| <b>Relapse</b>                                              |               |                                              |                 |
| <b>Smoldering Active</b>                                    |               |                                              |                 |
| <b>Remission on Therapy</b>                                 |               |                                              |                 |
| <b>Unresponsive to treatment</b>                            |               |                                              |                 |

**Follow up data on the UNC cohort (in years):**

Median: 3.9425

Mean: 5.6867

SD: 5.1586

IQR: 1.2047 to 9.2895

Full range: 0.0301 to 27.8768

The median follow up for the cohort was 3.9 years with 50% of patients followed from 1.2 to 9.3 years (full range was a few days (for those who died early) to as long as 27.9 years).

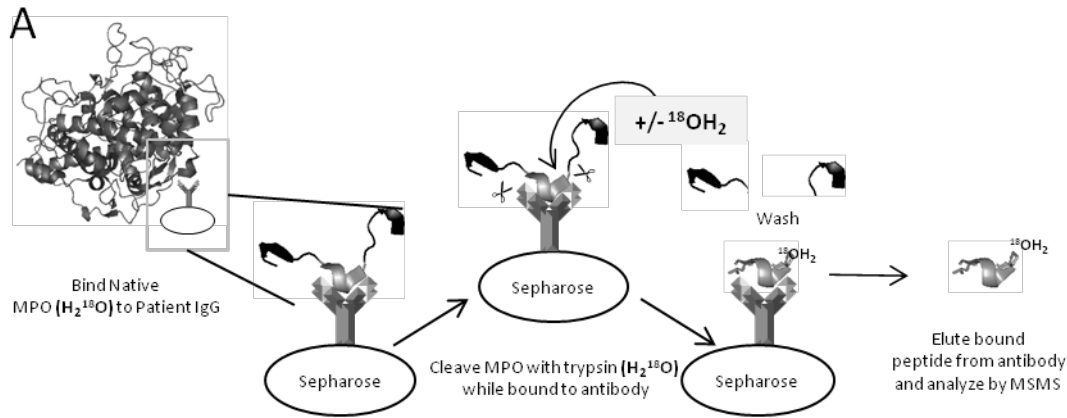

|                               |      | Epitopes associated with disease |         |         |         |         |         |         |         |         |         | Epitopes not associated with disease |         |         |         |         |         |         |         |         |         |         |         |         |         |  |
|-------------------------------|------|----------------------------------|---------|---------|---------|---------|---------|---------|---------|---------|---------|--------------------------------------|---------|---------|---------|---------|---------|---------|---------|---------|---------|---------|---------|---------|---------|--|
|                               |      | 537-548                          | 490-499 | 328-351 | 220-228 | 198-219 | 448-459 | 715-725 | 369-374 | 442-447 | 657-664 | 184-193                              | 516-524 | 560-571 | 692-701 | 474-480 | 437-441 | 396-405 | 579-590 | 237-244 | 460-473 | 530-536 | 593-603 | 572-578 | 678-691 |  |
| Active ANCA-negative patients | 1    |                                  |         |         |         |         | +       |         |         |         |         |                                      |         |         |         |         |         |         | +       | +       |         | +       |         |         |         |  |
|                               | 2    |                                  |         |         |         |         | +       |         |         |         |         |                                      |         |         |         |         |         |         |         |         |         |         |         |         |         |  |
|                               | 3    |                                  |         |         |         |         | +       |         |         |         |         |                                      |         |         |         |         |         |         |         |         | +       |         |         |         |         |  |
|                               | 4    |                                  |         |         |         |         | +       |         |         |         |         |                                      |         |         |         |         |         |         |         |         | +       |         |         |         |         |  |
|                               | 5    |                                  |         |         |         |         | +       |         |         |         |         |                                      |         |         |         |         |         |         |         | +       |         |         |         |         |         |  |
|                               | 6    |                                  |         |         |         |         | +       |         |         |         |         |                                      |         |         |         |         |         |         |         | +       |         |         |         |         |         |  |
|                               | 7    |                                  |         |         |         |         | +       |         |         |         |         |                                      |         |         |         |         |         |         |         |         |         |         |         |         |         |  |
|                               | 8    |                                  |         |         |         |         | +       |         |         |         |         |                                      |         |         |         |         |         |         |         |         |         |         |         |         |         |  |
| Clinical Remission            | 9-11 | zero epitopes observed           |         |         |         |         |         |         |         |         |         |                                      |         |         |         |         |         |         |         |         |         |         |         |         |         |  |
|                               | 12   |                                  |         |         |         |         |         |         |         |         |         |                                      |         |         |         |         |         |         |         | ⊕       |         |         |         |         |         |  |
| Healthy Subjects              | A    |                                  |         |         |         |         |         |         |         |         |         |                                      |         |         |         |         |         |         |         |         |         | ⊕       |         |         |         |  |
|                               | B    |                                  |         |         |         |         |         |         |         |         |         |                                      |         |         |         |         |         |         |         |         |         |         |         |         |         |  |
|                               | C    |                                  |         |         |         |         |         |         |         |         |         |                                      |         |         |         |         |         |         |         |         |         | ⊕       |         |         |         |  |
|                               | D    |                                  |         |         |         |         |         |         |         |         |         |                                      |         |         |         |         |         |         |         |         |         |         |         | ⊕       |         |  |
|                               | E    |                                  |         |         |         |         |         |         |         |         |         |                                      |         |         |         |         |         |         |         | ⊕       |         |         |         |         |         |  |
|                               | F    |                                  |         |         |         |         |         |         |         |         |         |                                      |         |         |         |         |         |         |         | ⊕       |         |         |         |         |         |  |
|                               | G    |                                  |         |         |         |         |         |         |         |         |         |                                      |         |         |         |         |         |         |         | ⊕       |         |         |         |         |         |  |
|                               | H    |                                  |         |         |         |         |         |         |         |         |         |                                      |         | ⊕       |         |         |         |         |         |         | ⊕       |         |         |         |         |  |
|                               | I    |                                  |         |         |         |         |         |         |         |         |         |                                      |         |         |         |         |         |         |         | ⊕       |         |         |         |         |         |  |
|                               | J    |                                  |         |         |         |         |         |         |         |         |         |                                      |         |         |         |         |         |         |         | ⊕       |         |         |         |         | ⊕       |  |

**Supplemental Figure 1.**

Supplemental Figure 1: Epitope Excision method for conformational epitope mapping of myeloperoxidase (MPO) and identification of MPO specific epitopes in active disease, clinical remission and healthy subjects. **Panel A** shows the epitope excision method with or without the addition of  $^{18}O$  to determine the specificity of autoantibodies to native MPO. **Table:** ANCA-negative patient's sera samples were analyzed at active disease (n=8) and four patients with longitudinal samples during disease remission. These results show that MPO epitope aa447-459 was the exclusive disease associated epitope in this cohort of patients. In comparison ANCA-negative patients have measurable levels of asymptomatic or 'natural' autoantibodies found in healthy controls (circle).

**Supplemental Figure 2.**

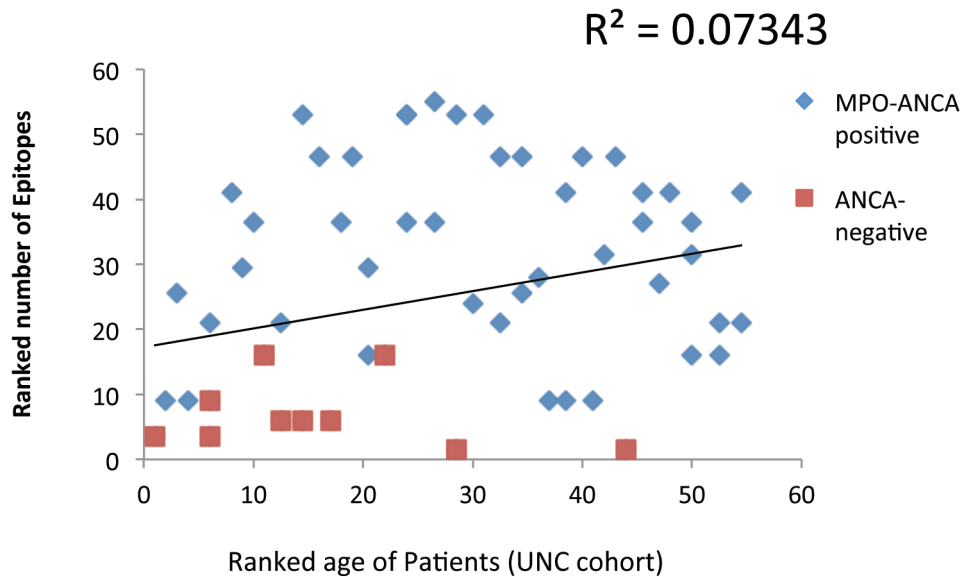

Supplemental Figure 2: Wilcoxon signed-rank test comparing the number of epitope specific autoantibodies with the age of the individual at the time of sample.

**Supplemental Figure 3.**

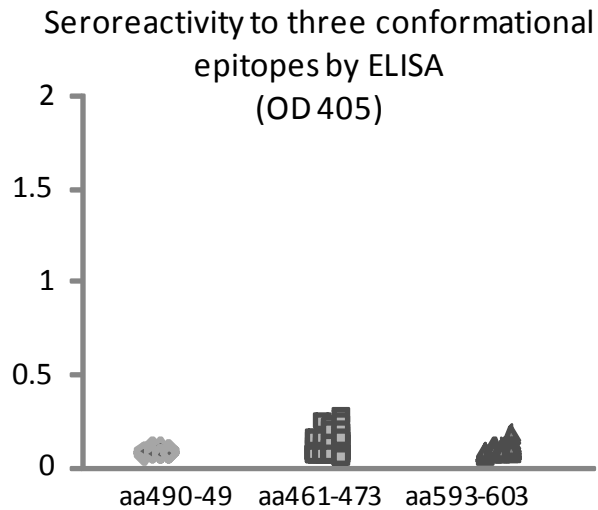

Supplemental Figure 3: Conformationally dependent MPO epitopes, determined by loss of reactivity with pre-digested protein during epitope excision MS protocol, were synthesized as peptides and tested for reactivity by ELISA.

**Supplemental Figure 4: Fine Epitope Mapping**

| <b>Trypsin Cut (RK)</b> | <b>Chymotrypsin Cut (FYWLM)</b> |
|-------------------------|---------------------------------|
| NGFPVALAR               | <b>NGFPVALAR</b>                |
| FPTDQLTPDQER            | FPTDQLTPDQER                    |
| FQDNGR                  | <b>FQDNGR</b>                   |
| RKIVGAMVQIITYR          | <b>RKIVGAMVQIITYR</b>           |
| IANVFTNAFR              | <b>IANVFTNAFR</b>               |
| VFFASWR                 | <b>VFFASWR</b>                  |
| QNQIAVDEIR              | <b>QNQIAVDEIR</b>               |
| IGLDLPALNMQR            | <b>IGLDLPALNMQR</b>             |
| QALAQISLPR              | QALAQISLPR                      |
| YQPMENPR                | <b>YQPMENPR</b>                 |
| DHGLPGYNAWR             | DHGLPGYNAWR                     |
| DYLPLVLGPTAMR           | <b>DYLPLVLGPTAMR</b>            |

Supplemental Figure 4: MS epitope excision was used to fine epitope map MPO epitopes by substituting the tryptic digest with chymotrypsin. This alternate analysis shows the specific amino acids (shown in red and blue) that remain bound to the antibody using a more aggressive enzymatic digestion.

**Supplemental Figure 5: DR2 tg mice immunized with murine MPO epitope aa442-460 develop GN**

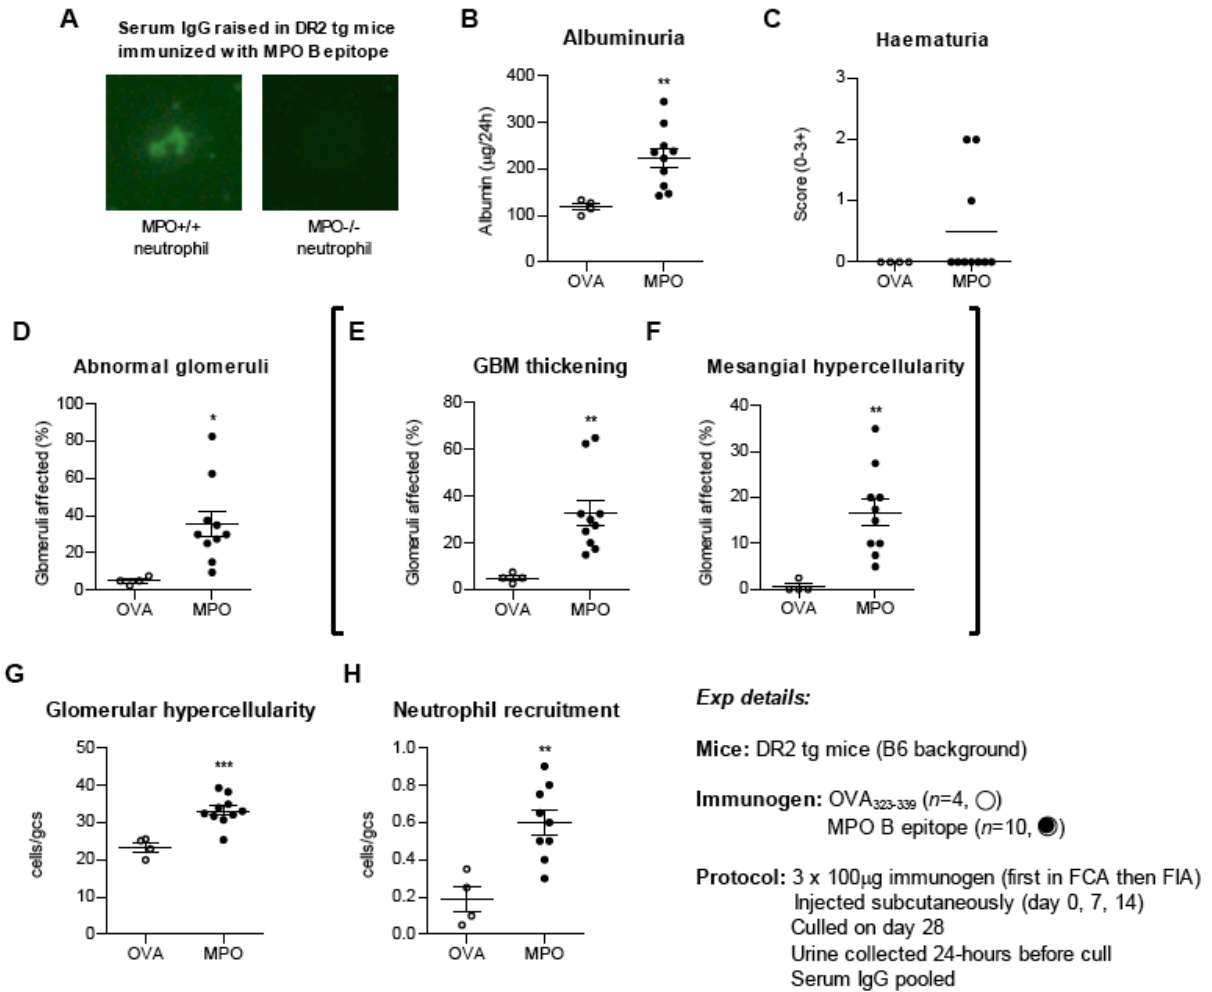

**Fig. Legends:**

- (A) Indirect immunofluorescence of thioglycollate induced peritoneal neutrophils using pooled serum IgG of DR2 tg mice immunized with the MPO B epitope. (IgG concentration for staining: 1mg/ml).
- (B) Albuminuria measured by ELISA on urine collected 24 hours before the end of the experiment.
- (C) Haematuria measured by urine test strips.
- (D, E and F) Abnormal glomeruli was assessed on formalin fixed PAS stained kidneys. Abnormalities assessed were thickening of the GBM (E) and evidence of mesangial hypercellularity (three or more attached nuclei) (F). Necrosis was rare.
- (G) Glomerular hypercellularity was assessed by enumerating the number of cells per glomerulus.
- (H) Glomerular neutrophil recruitment was assessed by immunohistochemistry by anti-Gr-1 antibody on PLP-fixed frozen kidneys.
